# Supplementary material for: Development of functionalized multi-walled carbon nanotube-based polysaccharide–hydroxyapatite scaffolds for bone tissue engineering
Source: Royal Society of Chemistry journal article supplement (doi:10.1039/c6ra16709h), 2016-01-01
Supplement: c6ra16709h1.pdf [file c6ra16709h1.pdf]

## Development of Functionalized Multi-walled Carbon Nanotube Based Polysaccharide-Hydroxyapatite Scaffolds for Bone Tissue Engineering

R. Rajesh,<sup>a,b</sup> Y. Dominic Ravichandran,<sup>a\*</sup> M. Jeevan Kumar Reddy,<sup>c</sup> Sung Hun Ryu,<sup>c</sup> A. M. Shanmugaraj<sup>c\*</sup>

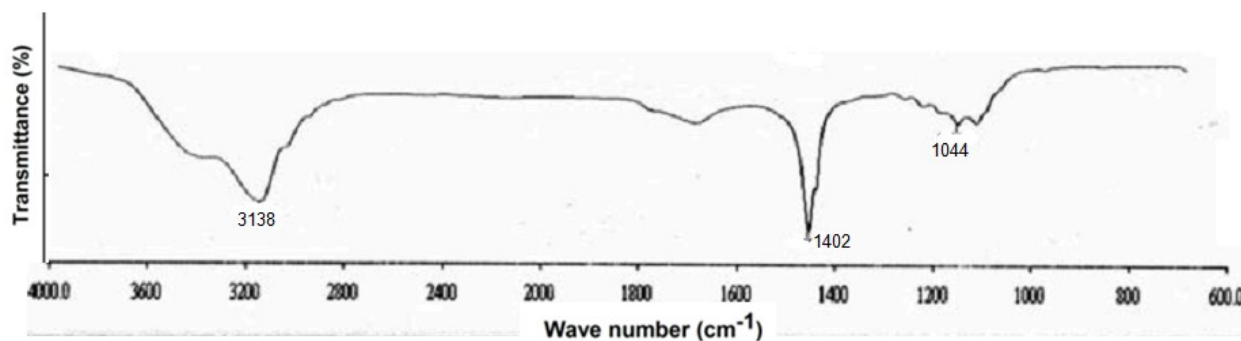

Fig S1. FTIR spectra of MWCNTs<sup>34</sup>

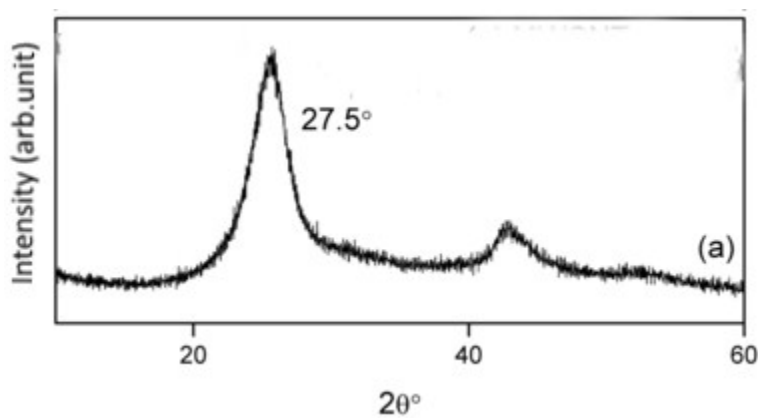

Fig S2. XRD pattern of MWCNTs<sup>34</sup>

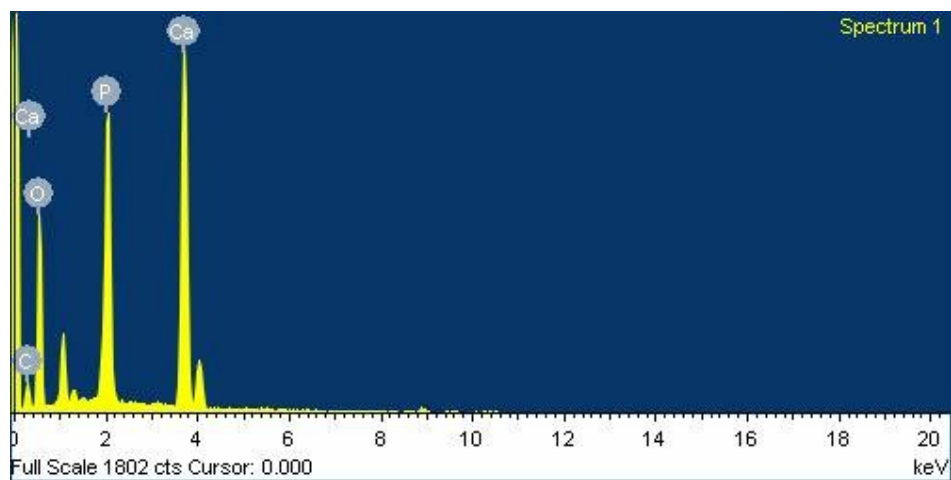

Fig S3. EDAX analysis of HAP<sup>12</sup>
